# Supplementary material
Source: PubMed Central journal article supplement (PMC6224707)
Supplement: mmc1.pdf [file mmc1.pdf]

# Standard Bronchoscopy With Fluoroscopy vs Thin Bronchoscopy and Radial Endobronchial Ultrasound for Biopsy of Pulmonary Lesions

A Multicenter, Prospective, Randomized Trial

*Nichole T. Tanner, MD; Lonny Yarmus, DO; Alexander Chen, MD;  
Jessica Wang Memoli, MD; Hiren J. Mehta, MD; Nicholas J. Pastis, MD;  
Hans Lee, MD; Michael A. Jantz, MD; Paul J. Nietert, PhD; and  
Gerard A. Silvestri, MD*

CHEST 2018; 154(5):1035-1043

*Online supplements are not copyedited prior to posting and the author(s) take full responsibility for the accuracy of all data.*

© 2018 AMERICAN COLLEGE OF CHEST PHYSICIANS. Reproduction of this article is prohibited without written permission from the American College of Chest Physicians. See online for more details. DOI: 10.1016/j.chest.2018.08.1026

**e-Table 1:** Participating Site IRB approval

|                                                   |
|---------------------------------------------------|
| John's Hopkins: NA_00093267                       |
| Medical University of South Carolina: Pro00029233 |
| University of Florida: 20150432                   |
| Washington- MedStar Hospital: 2014-032            |
| Washington University St. Louis: 201402063        |

**e-Table 2.** Comparisons in diagnostic yield between treatment arms, stratified by patient subgroups

| Subgroup                   | SB-FB (n=85)  | TB-EBUS (n=112) | P-Value* |
|----------------------------|---------------|-----------------|----------|
| <b>Size</b>                |               |                 |          |
| 15 to 25mm                 | 23.5% of n=34 | 38.7% of n=31   | 0.19     |
| 26 to 35mm                 | 40.9% of n=22 | 45.0% of n=40   | 0.76     |
| 36 to 50mm                 | 51.7% of n=29 | 61.0% of n=41   | 0.44     |
| <b>Location</b>            |               |                 |          |
| Lower                      | 34.6% of n=26 | 27.3% of n=22   | 0.58     |
| Middle                     | 40.0% of n=10 | 45.5% of n=11   | 0.99     |
| Upper                      | 38.8% of n=49 | 55.7% of n=79   | 0.06     |
| <b>Spiculation present</b> |               |                 |          |
| No                         | 27.0% of n=37 | 43.6% of n=55   | 0.11     |
| Yes                        | 45.8% of n=48 | 54.4% of n=57   | 0.38     |
| <b>Lobulation present</b>  |               |                 |          |
| No                         | 41.9% of n=62 | 56.3% of n=80   | 0.09     |
| Yes                        | 26.1% of n=23 | 31.3% of n=32   | 0.68     |
| <b>Sedation type</b>       |               |                 |          |
| General or MAC             | 34.3% of n=35 | 48.7% of n=39   | 0.31     |
| Conscious                  | 40.0% of n=50 | 49.3% of n=73   |          |

\* by chi-square or Fisher's exact test, as appropriate

**e-Table 3.** Comparisons in diagnostic test characteristics<sup>†</sup> between treatment arms

| Test characteristic | SB-FB (n=85)   | TB-EBUS (n=112) | P-Value* |
|---------------------|----------------|-----------------|----------|
| Sensitivity         |                |                 |          |
| %                   | 43.5%          | 57.8%           | 0.09     |
| 95% CI              | (31.0%, 56.7%) | (46.5%, 68.6%)  |          |
| Specificity         |                |                 |          |
| %                   | 29.4%          | 31.8%           | 0.87     |
| 95% CI              | (10.3%, 56.0%) | (13.9%, 54.9%)  |          |

\* by chi-square test

<sup>†</sup> By design, positive and negative predictive values were assumed to be 100% for both SB-F and TB-EBUS because positive (malignant) and negative (benign) test results were made using ROSE (for SB-F arm) in combination with transbronchial biopsies.
